# Supplementary material
Source: ML conference proceedings conference paper supplement (https://openreview.net/forum?id=G3vceNrP4o)
Supplement: supplementary_material [file attachment]

# Bridge the Gap between SNN and ANN for Image Restoration ICLR2025

Anonymous authors

October 2024

## **1 Demo**

We release the model's URL link address at [demo](#).
